# Supplementary figures and images for: Incomplete vesicular docking limits synaptic strength under high release probability conditions
Source: eLife journal article supplement (doi:10.7554/elife.52137), 2020-03-31

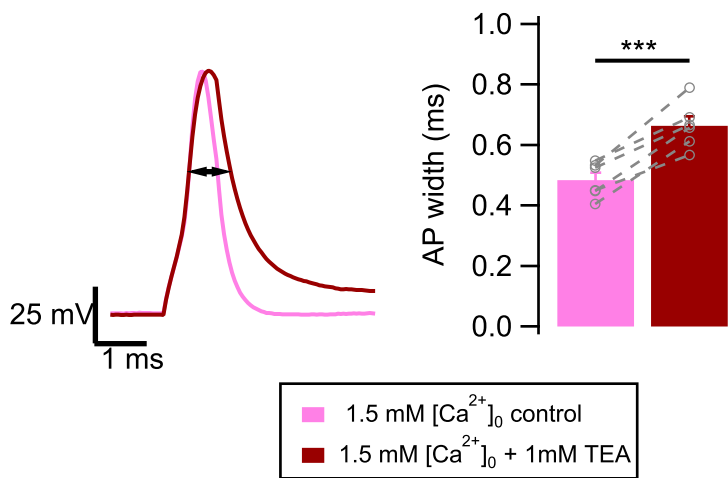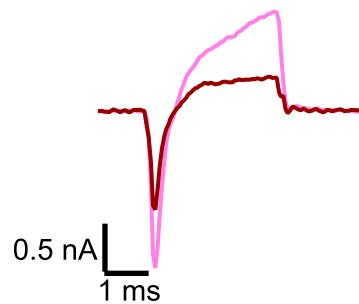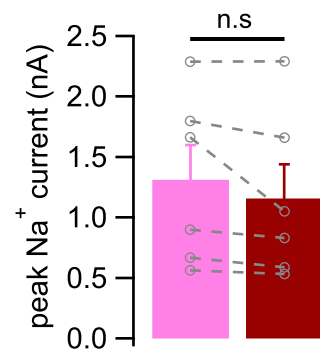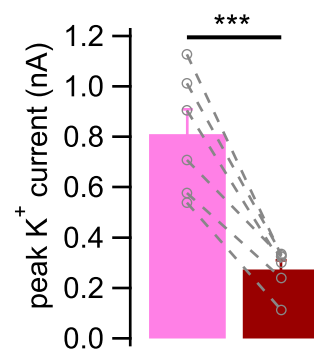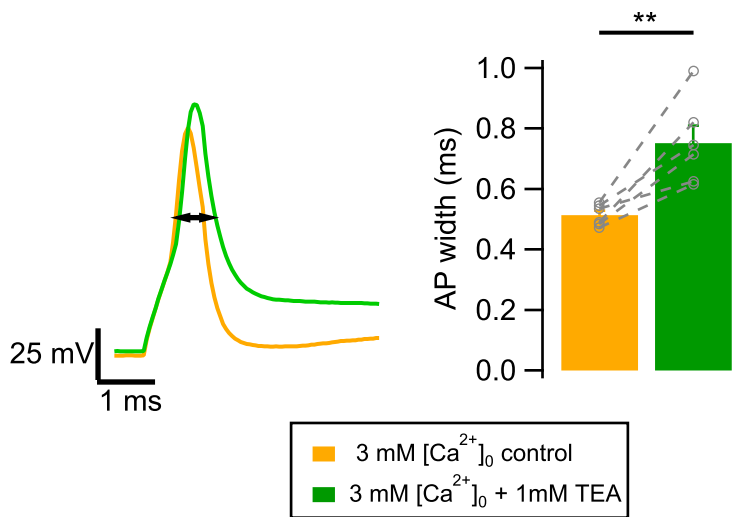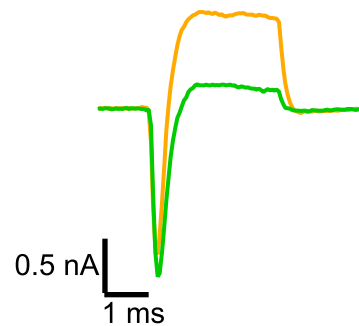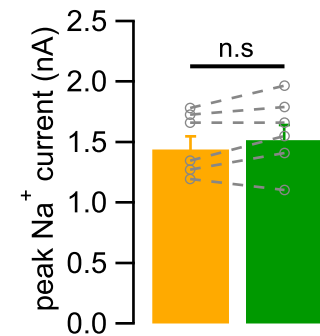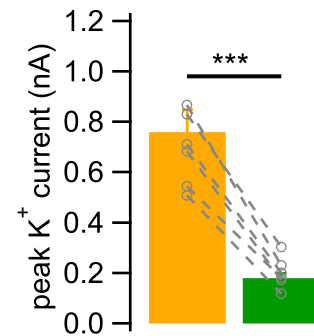

Supplement: supp [file elife_poa_e52137_Figure_1_figure_supplement_1.pdf › elife_poa_e52137_Figure_1_figure_supplement_1.pdf]

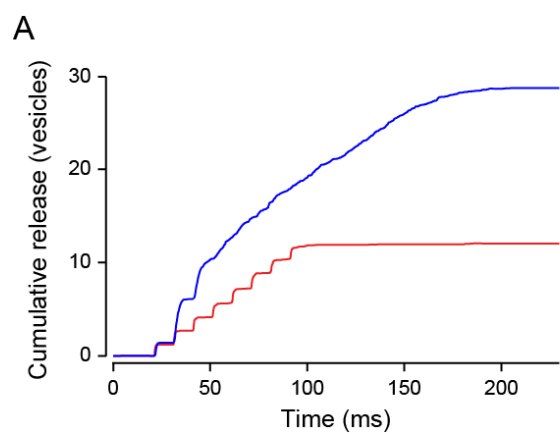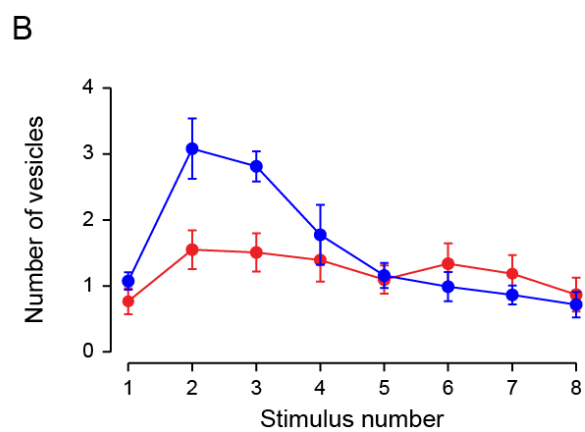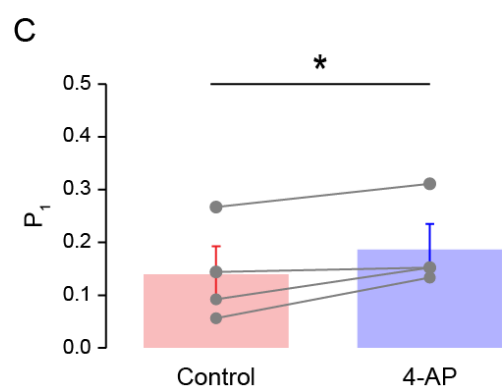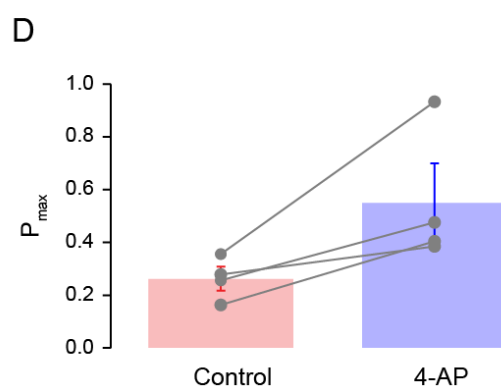

Supplement: supp [file elife_poa_e52137_Figure_4_figure_supplement_1.pdf › elife_poa_e52137_Figure_4_figure_supplement_1.pdf]
